# Supplementary material
Source: HighWire-hosted journal article supplement (https://www.annals.org/content/suppl/2007/03/29/146.7.502)
Supplement: Brewer_A1_146-7-502-DC1-A1.pdf [file Brewer_A1_146-7-502-DC1-A1.pdf]

*Appendix Table 1. Characteristics of Reviewed Studies\**

| Author, Year (Reference)                                          | Study Country  | Study Design and Objective†                                                                                                      | Included Women Age 40–49 Years   | Dropout Rate from Screening to Outcome Assessment, % | Initial Screening Mammogram Assessment | Time from Abnormal Result to Negative Result for Cancer               | Tests Used to Rule Out Cancer                                                      | Return for Mammography, n# | Timing and Method of Assessment of Return Mammography                                                                                             | Other Outcomes, n# |
|-------------------------------------------------------------------|----------------|----------------------------------------------------------------------------------------------------------------------------------|----------------------------------|------------------------------------------------------|----------------------------------------|-----------------------------------------------------------------------|------------------------------------------------------------------------------------|----------------------------|---------------------------------------------------------------------------------------------------------------------------------------------------|--------------------|
| Aro et al., 2000 (34)                                             | Finland        | Prospective cohort study of psychological distress after false-positive mammogram                                                | No                               | 5 (at 2 mo); 20 (at 12 mo)                           | Medical records                        | 2–27 d to follow-up test; time to negative result NR                  | NR                                                                                 | –                          | –                                                                                                                                                 | 781–881            |
| Barton et al., 2004 (35)                                          | United States  | Prospective cohort study (data are from nonintervention groups of a controlled trial to reduce anxiety after abnormal mammogram) | Yes                              | 15                                                   | Medical records                        | 72% of women with abnormal mammogram received negative result at 3 wk | Mammography, ultrasonography, biopsy                                               | –                          | –                                                                                                                                                 | 588                |
| Brett et al., 1998 (36)                                           | United Kingdom | Prospective cohort study of adverse psychological consequences of false-positive mammogram                                       | No                               | 24 (from those invited from previous study [38])     | Medical records                        | NR                                                                    | Mammography, clinical examination, ultrasonography, fine-needle aspiration, biopsy | –                          | –                                                                                                                                                 | 279                |
| Brett and Austoker, 2001 (37) (same study sample as reference 36) | United Kingdom | Prospective cohort study of adverse psychological consequences of false-positive mammogram                                       | No                               | 23 (reported by authors but denominator is unclear)  | Medical records                        | NR                                                                    | Mammography, clinical examination, ultrasonography, fine-needle aspiration, biopsy | 505                        | 35 mo since initial screening; assessed from medical records                                                                                      | 167                |
| Ong et al., 1997 (38) (same study sample as reference 36)         | United Kingdom | Prospective cohort study of the effects of early recall relative to false-positive and normal mammograms                         | No                               | 25                                                   | Medical records                        | NR                                                                    | Mammography, clinical examination, ultrasonography, fine-needle aspiration, biopsy | –                          | –                                                                                                                                                 | 394                |
| Bull and Campbell, 1991 (39)                                      | United Kingdom | Prospective cohort study of psychological effect of routine breast screening program                                             | No                               | 19                                                   | Medical records                        | NR                                                                    | Mammography, ultrasonography, fine-needle aspiration, biopsy                       | –                          | –                                                                                                                                                 | 573–584            |
| Burman et al., 1999 (30)                                          | United States  | Prospective cohort study of effect of false-positive mammogram on routine mammography                                            | Yes                              | 27                                                   | Medical records                        | NR                                                                    | Mammography, ultrasonography, early recall for mammography, biopsy                 | 5059                       | Time since initial screening varied (18–42 mo) and the assessment of return was 6 mo past the recommended interval; assessed from medical records | –                  |
| Chiarelli et al., 2003 (40)                                       | Canada         | Retrospective cohort study of the effect of false-positive mammogram on reattendance for routine mammography screening           | No                               | 28                                                   | Medical records                        | NR                                                                    | NR                                                                                 | 125 250                    | 36 mo since initial screening; assessed from medical records                                                                                      | –                  |
| Cockburn et al., 1994 (41)                                        | Australia      | Prospective cohort study of psychological consequences of mammography screening                                                  | No                               | 19                                                   | Medical records                        | NR (results of initial mammograms sent 7 d later)                     | Mammography, clinical examination, ultrasonography                                 | –                          | –                                                                                                                                                 | 200                |
| Ellman et al., 1989 (42)                                          | United Kingdom | Prospective cohort study of psychiatric morbidity associated with screening for breast cancer                                    | Yes (included women age 45–49 y) | 2                                                    | Medical records                        | NR                                                                    | NR                                                                                 | –                          | –                                                                                                                                                 | 553                |
| Gram et al., 1990 (43)                                            | Norway         | Prospective cohort study of quality of life after receiving a false-positive mammogram                                           | Yes                              | 14 (at 6 mo); 35 (at 18 mo)                          | Medical records                        | NR                                                                    | Mammography, biopsy                                                                | –                          | –                                                                                                                                                 | 287–357            |

Appendix Table 1—Continued

| Author, Year (Reference)                                     | Study Country  | Study Design and Objective†                                                                                                        | Included Women Age 40–49 Years                           | Dropout Rate from Screening to Outcome Assessment, % | Initial Screening Mammogram Assessment | Time from Abnormal Result to Negative Result for Cancer | Tests Used to Rule Out Cancer                                                      | Return for Mammography, n‡ | Timing and Method of Assessment of Return Mammography                                                     | Other Outcomes, n‡ |
|--------------------------------------------------------------|----------------|------------------------------------------------------------------------------------------------------------------------------------|----------------------------------------------------------|------------------------------------------------------|----------------------------------------|---------------------------------------------------------|------------------------------------------------------------------------------------|----------------------------|-----------------------------------------------------------------------------------------------------------|--------------------|
| Hofvind et al., 2003 (44)                                    | Norway         | Prospective cohort study of reattendance for routine mammography related to previous screening experiences and attitudes           | No                                                       | 13                                                   | Medical records                        | NR                                                      | NR                                                                                 | 539                        | 24 mo since initial screening; assessed from medical records                                              | –                  |
| Jatoi et al., 2006 (45)                                      | United States  | Cross-sectional study of psychological distress related to false-positive mammograms                                               | Yes                                                      | NA (nonparticipation rate, 28%)                      | Self-report                            | NR                                                      | NR                                                                                 | –                          | –                                                                                                         | 9571–9598          |
| Johnson et al., 1996 (27)                                    | Canada         | Retrospective cohort study of adherence to screening mammography program                                                           | No (no data on false-positive results in younger cohort) | 47                                                   | Medical records                        | NR                                                      | NR                                                                                 | 3371                       | 18 mo since initial screening; assessed from medical records                                              | –                  |
| Lampic et al., 2001 (46)                                     | Sweden         | Prospective, age-matched cohort study of short- and long-term anxiety and depression in women routinely screened for breast cancer | Yes                                                      | 9 (at 3 mo); 17 (at 12 mo)                           | Medical records                        | Within 2–8 wk                                           | Clinical examination, mammography, ultrasonography, fine-needle aspiration, biopsy | –                          | –                                                                                                         | 619–684            |
| Lampic et al., 2003 (47) (same study sample as reference 46) | Sweden         | Prospective, age-matched cohort study of short- and long-term anxiety and depression in women routinely screened for breast cancer | Yes                                                      | 21 (at 24 mo)                                        | Medical records                        | Within 2–8 wk                                           | Clinical examination, mammography, ultrasonography, fine-needle aspiration, biopsy | 668                        | 30 mo since initial screening; assessed from medical records                                              | 556–601            |
| Lerman et al., 1991 (31)                                     | United States  | Prospective cohort study of psychological and behavioral consequences of false-positive mammograms                                 | No                                                       | 15                                                   | Medical records                        | Within 1–2 mo                                           | Ultrasonography, biopsy, may include some early recall                             | 308                        | 15 mo since initial screening; assessed by self-report                                                    | 305                |
| Lerman et al., 1991 (48) (same study sample as reference 31) | United States  | Prospective cohort study of psychological side effects of false-positive mammograms                                                | No                                                       | 15 (at 3 mo); 20 (at 15 mo)                          | Medical records                        | Within 1–2 mo                                           | Ultrasonography, biopsy, may include some early recall                             | –                          | –                                                                                                         | 299                |
| Lipkus et al., 2000 (49)                                     | United States  | Cross-sectional study of the effect of false-positive screening mammograms on subsequent screening and psychosocial outcomes       | Yes                                                      | NA (nonparticipation rate, 24%)                      | Self-report                            | NR                                                      | NR (some had biopsy)                                                               | 1047                       | 15 mo (patient age ≥51 y) or 27 mo (patient age 40–50 y) since initial screening; assessed by self-report | 1047               |
| McCann et al., 2002 (50)                                     | United Kingdom | Retrospective cohort study of the effect of false-positive mammograms on return for routine mammography and risk for cancer        | Yes (included women age 49 y)                            | 14                                                   | Medical records                        | NR                                                      | Ultrasonography, fine-needle aspiration, biopsy                                    | 113 409                    | 42 mo since initial screening; assessed from medical records                                              | –                  |
| Meystre-Agustoni et al., 2001 (51)                           | Switzerland    | Prospective cohort study of effects of mammography screening on anxiety                                                            | No                                                       | 3                                                    | Medical records                        | NR                                                      | NR                                                                                 | –                          | –                                                                                                         | 859                |
| Olsson et al., 1999 (52)                                     | Sweden         | Prospective cohort study of ways that women cope with false-positive mammograms                                                    | Yes                                                      | 10 (includes those who declined a 2-wk survey)       | Medical records                        | NR (1 wk on average for follow-up testing)              | Mammography, clinical examination, ultrasonography, fine-needle aspiration, biopsy | –                          | –                                                                                                         | 1222               |

Continued on following page

Appendix Table 1—Continued

| Author, Year (Reference)     | Study Country   | Study Design and Objective†                                                                                                 | Included Women Age 40–49 Years   | Dropout Rate from Screening to Outcome Assessment, % | Initial Screening Mammogram Assessment | Time from Abnormal Result to Negative Result for Cancer | Tests Used to Rule Out Cancer           | Return for Mammography, n‡ | Timing and Method of Assessment of Return Mammography                                                                        | Other Outcomes, n‡ |
|------------------------------|-----------------|-----------------------------------------------------------------------------------------------------------------------------|----------------------------------|------------------------------------------------------|----------------------------------------|---------------------------------------------------------|-----------------------------------------|----------------------------|------------------------------------------------------------------------------------------------------------------------------|--------------------|
| O'Sullivan et al., 2001 (53) | United Kingdom  | Retrospective cohort study of false-positive mammograms on routine mammography screening                                    | No                               | 29                                                   | Medical records                        | NR                                                      | NR                                      | 5649                       | 36 mo since initial screening (some women were asked to return earlier); assessed from medical records                       | –                  |
| Pinckney et al., 2003 (33)   | United States   | Retrospective cohort study of effect of false-positive mammograms on routine mammography screening                          | Yes                              | 43 (at 18 mo); 31 (at 24 mo); 17 (at 30 mo)          | Medical records                        | NR                                                      | Mammography, “other diagnostic testing” | 41 844                     | 18 mo since initial screening; assessed from medical records                                                                 | –                  |
| Pisano et al., 1998 (15)     | United States   | Prospective cohort study of effect of false-positive mammograms on routine mammography screening                            | No                               | 21                                                   | Medical records                        | NR (within 6 mo)                                        | Biopsy only                             | 96                         | 24–48 mo since initial screening (adherence defined as having had 3 mammographies within 3 y); assessed from medical records | 90                 |
| Sandin et al., 2002 (54)     | Spain           | Prospective cohort study of the psychological effects of false-positive mammograms                                          | Yes (included women age 45–49 y) | 0                                                    | Medical records                        | NR                                                      | NR                                      | –                          | –                                                                                                                            | 1195               |
| Scaf-Klomp et al., 1997 (55) | The Netherlands | Prospective cohort study of psychological side effects of breast cancer screening; cohorts matched for age and municipality | No                               | 35 (at 8–10 wk); 41 (at 6 mo)                        | Medical records                        | Less than 8–10 wk                                       | NR                                      | –                          | –                                                                                                                            | 164–185            |

\* Dashes mean that the outcome was not assessed. NA = not available; NR = not reported.

† “Prospective cohort study” refers to studies in which the outcome of screening mammography was known before a later survey or assessment of return for mammography. Study objectives are those stated by the authors.

‡ Sample sizes refer to usable data abstracted for this review and may be smaller than the total number reported by the authors for their studies.
